# Supplementary material
Source: publisher site journal article supplement (https://www.dovepress.com/article/86343)
Supplement: Supplementary file 1 [file get_supplementary_file.php]

## Interaction pairs

|        |        |
|--------|--------|
| ANAPC7 | AURKA  |
| ANAPC7 | AURKB  |
| ANAPC7 | BUB1B  |
| ANAPC7 | CCNB1  |
| ANAPC7 | CDC20  |
| ANAPC7 | NEK2   |
| ANAPC7 | PLK1   |
| ANAPC7 | PTTG1  |
| ANAPC7 | UBB    |
| ANAPC7 | UBE2C  |
| AURKA  | AURKB  |
| AURKA  | BUB1B  |
| AURKA  | CCNB1  |
| AURKA  | CDC20  |
| AURKA  | NEK2   |
| AURKA  | PLK1   |
| AURKA  | PTTG1  |
| AURKA  | UBB    |
| AURKA  | UBE2C  |
| AURKA  | ASPM   |
| AURKA  | BIRC5  |
| AURKA  | CCNF   |
| AURKA  | CDCA2  |
| AURKA  | CDCA3  |
| AURKA  | CDCA8  |
| AURKA  | CDKN3  |
| AURKA  | CENPA  |
| AURKA  | CENPE  |
| AURKA  | CENPF  |
| AURKA  | DLGAP5 |
| AURKA  | FAM64A |
| AURKA  | FAM83D |
| AURKA  | FOXM1  |
| AURKA  | GTSE1  |
| AURKA  | HMMR   |
| AURKA  | KIF14  |
| AURKA  | KIF18B |
| AURKA  | KIF20A |
| AURKA  | KIF23  |
| AURKA  | KIF4A  |
| AURKA  | KNSTRN |
| AURKA  | NCAPD2 |
| AURKA  | PSRC1  |
| AURKA  | TACC3  |
| AURKA  | TOP2A  |
| AURKA  | TROAP  |
| AURKA  | RCC2   |
| AURKB  | BUB1B  |
| AURKB  | CCNB1  |

|       |        |
|-------|--------|
| AURKB | CDC20  |
| AURKB | NEK2   |
| AURKB | PLK1   |
| AURKB | PTTG1  |
| AURKB | UBB    |
| AURKB | UBE2C  |
| AURKB | ASPM   |
| AURKB | BIRC5  |
| AURKB | CCNF   |
| AURKB | CDCA2  |
| AURKB | CDCA3  |
| AURKB | CDCA8  |
| AURKB | CDKN3  |
| AURKB | CENPA  |
| AURKB | CENPE  |
| AURKB | CENPF  |
| AURKB | DLGAP5 |
| AURKB | FAM64A |
| AURKB | FAM83D |
| AURKB | FOXM1  |
| AURKB | GTSE1  |
| AURKB | HMMR   |
| AURKB | KIF14  |
| AURKB | KIF18B |
| AURKB | KIF20A |
| AURKB | KIF23  |
| AURKB | KIF4A  |
| AURKB | KNSTRN |
| AURKB | NCAPD2 |
| AURKB | PSRC1  |
| AURKB | TACC3  |
| AURKB | TOP2A  |
| AURKB | TROAP  |
| AURKB | RCC2   |
| BUB1B | CCNB1  |
| BUB1B | CDC20  |
| BUB1B | NEK2   |
| BUB1B | PLK1   |
| BUB1B | PTTG1  |
| BUB1B | UBB    |
| BUB1B | UBE2C  |
| BUB1B | ASPM   |
| BUB1B | BIRC5  |
| BUB1B | CCNF   |
| BUB1B | CDCA2  |
| BUB1B | CDCA3  |
| BUB1B | CDCA8  |
| BUB1B | CDKN3  |
| BUB1B | CENPA  |
| BUB1B | CENPE  |

|       |        |
|-------|--------|
| BUB1B | CENPF  |
| BUB1B | DLGAP5 |
| BUB1B | FAM64A |
| BUB1B | FAM83D |
| BUB1B | FOXM1  |
| BUB1B | GTSE1  |
| BUB1B | HMMR   |
| BUB1B | KIF14  |
| BUB1B | KIF18B |
| BUB1B | KIF20A |
| BUB1B | KIF23  |
| BUB1B | KIF4A  |
| BUB1B | KNSTRN |
| BUB1B | NCAPD2 |
| BUB1B | PSRC1  |
| BUB1B | TACC3  |
| BUB1B | TOP2A  |
| BUB1B | TROAP  |
| BUB1B | RCC2   |
| CCNB1 | CDC20  |
| CCNB1 | NEK2   |
| CCNB1 | PLK1   |
| CCNB1 | PTTG1  |
| CCNB1 | UBB    |
| CCNB1 | UBE2C  |
| CCNB1 | ASPM   |
| CCNB1 | BIRC5  |
| CCNB1 | CCNF   |
| CCNB1 | CDCA2  |
| CCNB1 | CDCA3  |
| CCNB1 | CDCA8  |
| CCNB1 | CDKN3  |
| CCNB1 | CENPA  |
| CCNB1 | CENPE  |
| CCNB1 | CENPF  |
| CCNB1 | DLGAP5 |
| CCNB1 | FAM64A |
| CCNB1 | FAM83D |
| CCNB1 | FOXM1  |
| CCNB1 | GTSE1  |
| CCNB1 | HMMR   |
| CCNB1 | KIF14  |
| CCNB1 | KIF18B |
| CCNB1 | KIF20A |
| CCNB1 | KIF23  |
| CCNB1 | KIF4A  |
| CCNB1 | KNSTRN |
| CCNB1 | NCAPD2 |
| CCNB1 | PSRC1  |
| CCNB1 | TACC3  |

|       |        |
|-------|--------|
| CCNB1 | TOP2A  |
| CCNB1 | TROAP  |
| CCNB1 | FOXO3  |
| CCNB1 | PIN1   |
| CCNB1 | FBXO43 |
| CCNB1 | PIF1   |
| CDC20 | NEK2   |
| CDC20 | PLK1   |
| CDC20 | PTTG1  |
| CDC20 | UBB    |
| CDC20 | UBE2C  |
| CDC20 | ASPM   |
| CDC20 | BIRC5  |
| CDC20 | CCNF   |
| CDC20 | CDCA2  |
| CDC20 | CDCA3  |
| CDC20 | CDCA8  |
| CDC20 | CDKN3  |
| CDC20 | CENPA  |
| CDC20 | CENPE  |
| CDC20 | CENPF  |
| CDC20 | DLGAP5 |
| CDC20 | FAM64A |
| CDC20 | FAM83D |
| CDC20 | FOXM1  |
| CDC20 | GTSE1  |
| CDC20 | HMMR   |
| CDC20 | KIF14  |
| CDC20 | KIF18B |
| CDC20 | KIF20A |
| CDC20 | KIF23  |
| CDC20 | KIF4A  |
| CDC20 | KNSTRN |
| CDC20 | NCAPD2 |
| CDC20 | PSRC1  |
| CDC20 | TACC3  |
| CDC20 | TOP2A  |
| CDC20 | TROAP  |
| CDC20 | RCC2   |
| CDC20 | FBXO43 |
| CDC20 | PIF1   |
| NEK2  | PLK1   |
| NEK2  | PTTG1  |
| NEK2  | UBB    |
| NEK2  | UBE2C  |
| NEK2  | ASPM   |
| NEK2  | BIRC5  |
| NEK2  | CCNF   |
| NEK2  | CDCA2  |
| NEK2  | CDCA3  |

|      |        |
|------|--------|
| NEK2 | CDCA8  |
| NEK2 | CDKN3  |
| NEK2 | CENPA  |
| NEK2 | CENPE  |
| NEK2 | CENPF  |
| NEK2 | DLGAP5 |
| NEK2 | FAM64A |
| NEK2 | FAM83D |
| NEK2 | FOXM1  |
| NEK2 | GTSE1  |
| NEK2 | HMMR   |
| NEK2 | KIF14  |
| NEK2 | KIF18B |
| NEK2 | KIF20A |
| NEK2 | KIF23  |
| NEK2 | KIF4A  |
| NEK2 | KNSTRN |
| NEK2 | NCAPD2 |
| NEK2 | PSRC1  |
| NEK2 | TACC3  |
| NEK2 | TOP2A  |
| NEK2 | TROAP  |
| PLK1 | PTTG1  |
| PLK1 | UBB    |
| PLK1 | UBE2C  |
| PLK1 | ASPM   |
| PLK1 | BIRC5  |
| PLK1 | CCNF   |
| PLK1 | CDCA2  |
| PLK1 | CDCA3  |
| PLK1 | CDCA8  |
| PLK1 | CDKN3  |
| PLK1 | CENPA  |
| PLK1 | CENPE  |
| PLK1 | CENPF  |
| PLK1 | DLGAP5 |
| PLK1 | FAM64A |
| PLK1 | FAM83D |
| PLK1 | FOXM1  |
| PLK1 | GTSE1  |
| PLK1 | HMMR   |
| PLK1 | KIF14  |
| PLK1 | KIF18B |
| PLK1 | KIF20A |
| PLK1 | KIF23  |
| PLK1 | KIF4A  |
| PLK1 | KNSTRN |
| PLK1 | NCAPD2 |
| PLK1 | PSRC1  |
| PLK1 | TACC3  |

|       |        |
|-------|--------|
| PLK1  | TOP2A  |
| PLK1  | TROAP  |
| PLK1  | RCC2   |
| PLK1  | FOXO3  |
| PLK1  | PIN1   |
| PLK1  | FBXO43 |
| PTTG1 | UBB    |
| PTTG1 | UBE2C  |
| PTTG1 | ASPM   |
| PTTG1 | BIRC5  |
| PTTG1 | CDCA2  |
| PTTG1 | CDCA3  |
| PTTG1 | CDCA8  |
| PTTG1 | CDKN3  |
| PTTG1 | CENPA  |
| PTTG1 | CENPE  |
| PTTG1 | CENPF  |
| PTTG1 | DLGAP5 |
| PTTG1 | FAM64A |
| PTTG1 | FAM83D |
| PTTG1 | FOXM1  |
| PTTG1 | HMMR   |
| PTTG1 | KIF14  |
| PTTG1 | KIF20A |
| PTTG1 | KIF23  |
| PTTG1 | KIF4A  |
| PTTG1 | KNSTRN |
| PTTG1 | NCAPD2 |
| PTTG1 | TOP2A  |
| PTTG1 | TROAP  |
| UBB   | UBE2C  |
| UBB   | PIN1   |
| UBE2C | ASPM   |
| UBE2C | BIRC5  |
| UBE2C | CCNF   |
| UBE2C | CDCA2  |
| UBE2C | CDCA3  |
| UBE2C | CDCA8  |
| UBE2C | CDKN3  |
| UBE2C | CENPA  |
| UBE2C | CENPE  |
| UBE2C | CENPF  |
| UBE2C | DLGAP5 |
| UBE2C | FAM64A |
| UBE2C | FAM83D |
| UBE2C | FOXM1  |
| UBE2C | GTSE1  |
| UBE2C | HMMR   |
| UBE2C | KIF14  |
| UBE2C | KIF18B |

|       |        |
|-------|--------|
| UBE2C | KIF20A |
| UBE2C | KIF23  |
| UBE2C | KIF4A  |
| UBE2C | KNSTRN |
| UBE2C | NCAPD2 |
| UBE2C | PSRC1  |
| UBE2C | TACC3  |
| UBE2C | TOP2A  |
| UBE2C | TROAP  |
| ASPM  | BIRC5  |
| ASPM  | CCNF   |
| ASPM  | CDCA2  |
| ASPM  | CDCA3  |
| ASPM  | CDCA8  |
| ASPM  | CDKN3  |
| ASPM  | CENPA  |
| ASPM  | CENPE  |
| ASPM  | CENPF  |
| ASPM  | DLGAP5 |
| ASPM  | FAM64A |
| ASPM  | FAM83D |
| ASPM  | FOXM1  |
| ASPM  | GTSE1  |
| ASPM  | HMMR   |
| ASPM  | KIF14  |
| ASPM  | KIF18B |
| ASPM  | KIF20A |
| ASPM  | KIF23  |
| ASPM  | KIF4A  |
| ASPM  | KNSTRN |
| ASPM  | NCAPD2 |
| ASPM  | PSRC1  |
| ASPM  | TACC3  |
| ASPM  | TOP2A  |
| ASPM  | TROAP  |
| BIRC5 | CCNF   |
| BIRC5 | CDCA2  |
| BIRC5 | CDCA3  |
| BIRC5 | CDCA8  |
| BIRC5 | CDKN3  |
| BIRC5 | CENPA  |
| BIRC5 | CENPE  |
| BIRC5 | CENPF  |
| BIRC5 | DLGAP5 |
| BIRC5 | FAM64A |
| BIRC5 | FAM83D |
| BIRC5 | FOXM1  |
| BIRC5 | GTSE1  |
| BIRC5 | HMMR   |
| BIRC5 | KIF14  |

|       |        |
|-------|--------|
| BIRC5 | KIF18B |
| BIRC5 | KIF20A |
| BIRC5 | KIF23  |
| BIRC5 | KIF4A  |
| BIRC5 | KNSTRN |
| BIRC5 | NCAPD2 |
| BIRC5 | PSRC1  |
| BIRC5 | TACC3  |
| BIRC5 | TOP2A  |
| BIRC5 | TROAP  |
| BIRC5 | RCC2   |
| BIRC5 | FOXO3  |
| CCNF  | CDCA2  |
| CCNF  | CDCA3  |
| CCNF  | CDCA8  |
| CCNF  | CDKN3  |
| CCNF  | CENPA  |
| CCNF  | CENPE  |
| CCNF  | CENPF  |
| CCNF  | DLGAP5 |
| CCNF  | FAM83D |
| CCNF  | FOXM1  |
| CCNF  | GTSE1  |
| CCNF  | HMMR   |
| CCNF  | KIF20A |
| CCNF  | KIF23  |
| CCNF  | KIF4A  |
| CCNF  | NCAPD2 |
| CCNF  | TACC3  |
| CCNF  | TOP2A  |
| CCNF  | TROAP  |
| CDCA2 | CDCA3  |
| CDCA2 | CDCA8  |
| CDCA2 | CDKN3  |
| CDCA2 | CENPA  |
| CDCA2 | CENPE  |
| CDCA2 | CENPF  |
| CDCA2 | DLGAP5 |
| CDCA2 | FAM64A |
| CDCA2 | FAM83D |
| CDCA2 | FOXM1  |
| CDCA2 | GTSE1  |
| CDCA2 | HMMR   |
| CDCA2 | KIF14  |
| CDCA2 | KIF18B |
| CDCA2 | KIF20A |
| CDCA2 | KIF23  |
| CDCA2 | KIF4A  |
| CDCA2 | KNSTRN |
| CDCA2 | NCAPD2 |



|       |        |
|-------|--------|
| CDCA2 | TACC3  |
| CDCA2 | TOP2A  |
| CDCA2 | TROAP  |
| CDCA2 | PIF1   |
| CDCA3 | CDCA8  |
| CDCA3 | CDKN3  |
| CDCA3 | CENPA  |
| CDCA3 | CENPE  |
| CDCA3 | CENPF  |
| CDCA3 | DLGAP5 |
| CDCA3 | FAM64A |
| CDCA3 | FAM83D |
| CDCA3 | FOXM1  |
| CDCA3 | GTSE1  |
| CDCA3 | HMMR   |
| CDCA3 | KIF14  |
| CDCA3 | KIF18B |
| CDCA3 | KIF20A |
| CDCA3 | KIF23  |
| CDCA3 | KIF4A  |
| CDCA3 | KNSTRN |
| CDCA3 | NCAPD2 |
| CDCA3 | PSRC1  |
| CDCA3 | TACC3  |
| CDCA3 | TOP2A  |
| CDCA3 | TROAP  |
| CDCA8 | CDKN3  |
| CDCA8 | CENPA  |
| CDCA8 | CENPE  |
| CDCA8 | CENPF  |
| CDCA8 | DLGAP5 |
| CDCA8 | FAM64A |
| CDCA8 | FAM83D |
| CDCA8 | FOXM1  |
| CDCA8 | GTSE1  |
| CDCA8 | HMMR   |
| CDCA8 | KIF14  |
| CDCA8 | KIF18B |
| CDCA8 | KIF20A |
| CDCA8 | KIF23  |
| CDCA8 | KIF4A  |
| CDCA8 | KNSTRN |
| CDCA8 | NCAPD2 |
| CDCA8 | PSRC1  |
| CDCA8 | TACC3  |
| CDCA8 | TOP2A  |
| CDCA8 | TROAP  |
| CDCA8 | RCC2   |
| CDKN3 | CENPA  |
| CDKN3 | CENPE  |

|       |        |
|-------|--------|
| CDKN3 | CENPF  |
| CDKN3 | DLGAP5 |
| CDKN3 | FAM64A |
| CDKN3 | FAM83D |
| CDKN3 | FOXM1  |
| CDKN3 | GTSE1  |
| CDKN3 | HMMR   |
| CDKN3 | KIF14  |
| CDKN3 | KIF18B |
| CDKN3 | KIF20A |
| CDKN3 | KIF23  |
| CDKN3 | KIF4A  |
| CDKN3 | KNSTRN |
| CDKN3 | NCAPD2 |
| CDKN3 | PSRC1  |
| CDKN3 | TACC3  |
| CDKN3 | TOP2A  |
| CDKN3 | TROAP  |
| CENPA | CENPE  |
| CENPA | CENPF  |
| CENPA | DLGAP5 |
| CENPA | FAM64A |
| CENPA | FAM83D |
| CENPA | FOXM1  |
| CENPA | GTSE1  |
| CENPA | HMMR   |
| CENPA | KIF14  |
| CENPA | KIF18B |
| CENPA | KIF20A |
| CENPA | KIF23  |
| CENPA | KIF4A  |
| CENPA | KNSTRN |
| CENPA | NCAPD2 |
| CENPA | PSRC1  |
| CENPA | TACC3  |
| CENPA | TOP2A  |
| CENPA | TROAP  |
| CENPA | RCC2   |
| CENPA | PIN1   |
| CENPE | CENPF  |
| CENPE | DLGAP5 |
| CENPE | FAM64A |
| CENPE | FAM83D |
| CENPE | FOXM1  |
| CENPE | GTSE1  |
| CENPE | HMMR   |
| CENPE | KIF14  |
| CENPE | KIF18B |
| CENPE | KIF20A |
| CENPE | KIF23  |

|        |        |
|--------|--------|
| CENPE  | KIF4A  |
| CENPE  | KNSTRN |
| CENPE  | NCAPD2 |
| CENPE  | TACC3  |
| CENPE  | TOP2A  |
| CENPE  | TROAP  |
| CENPE  | RCC2   |
| CENPF  | DLGAP5 |
| CENPF  | FAM64A |
| CENPF  | FAM83D |
| CENPF  | FOXM1  |
| CENPF  | GTSE1  |
| CENPF  | HMMR   |
| CENPF  | KIF14  |
| CENPF  | KIF18B |
| CENPF  | KIF20A |
| CENPF  | KIF23  |
| CENPF  | KIF4A  |
| CENPF  | KNSTRN |
| CENPF  | NCAPD2 |
| CENPF  | PSRC1  |
| CENPF  | TACC3  |
| CENPF  | TOP2A  |
| CENPF  | TROAP  |
| CENPF  | RCC2   |
| DLGAP5 | FAM64A |
| DLGAP5 | FAM83D |
| DLGAP5 | FOXM1  |
| DLGAP5 | GTSE1  |
| DLGAP5 | HMMR   |
| DLGAP5 | KIF14  |
| DLGAP5 | KIF18B |
| DLGAP5 | KIF20A |
| DLGAP5 | KIF23  |
| DLGAP5 | KIF4A  |
| DLGAP5 | KNSTRN |
| DLGAP5 | NCAPD2 |
| DLGAP5 | PSRC1  |
| DLGAP5 | TACC3  |
| DLGAP5 | TOP2A  |
| DLGAP5 | TROAP  |
| FAM64A | FAM83D |
| FAM64A | FOXM1  |
| FAM64A | GTSE1  |
| FAM64A | HMMR   |
| FAM64A | KIF14  |
| FAM64A | KIF18B |
| FAM64A | KIF20A |
| FAM64A | KIF23  |
| FAM64A | KIF4A  |

|        |        |
|--------|--------|
| FAM64A | KNSTRN |
| FAM64A | NCAPD2 |
| FAM64A | PSRC1  |
| FAM64A | TACC3  |
| FAM64A | TOP2A  |
| FAM64A | TROAP  |
| FAM64A | PIN1   |
| FAM83D | FOXM1  |
| FAM83D | GTSE1  |
| FAM83D | HMMR   |
| FAM83D | KIF14  |
| FAM83D | KIF20A |
| FAM83D | KIF23  |
| FAM83D | KIF4A  |
| FAM83D | KNSTRN |
| FAM83D | NCAPD2 |
| FAM83D | TOP2A  |
| FAM83D | TROAP  |
| FOXM1  | GTSE1  |
| FOXM1  | HMMR   |
| FOXM1  | KIF14  |
| FOXM1  | KIF18B |
| FOXM1  | KIF20A |
| FOXM1  | KIF23  |
| FOXM1  | KIF4A  |
| FOXM1  | KNSTRN |
| FOXM1  | NCAPD2 |
| FOXM1  | TACC3  |
| FOXM1  | TOP2A  |
| FOXM1  | TROAP  |
| FOXM1  | FOXO3  |
| GTSE1  | HMMR   |
| GTSE1  | KIF14  |
| GTSE1  | KIF18B |
| GTSE1  | KIF20A |
| GTSE1  | KIF23  |
| GTSE1  | KIF4A  |
| GTSE1  | KNSTRN |
| GTSE1  | NCAPD2 |
| GTSE1  | PSRC1  |
| GTSE1  | TACC3  |
| GTSE1  | TOP2A  |
| GTSE1  | TROAP  |
| HMMR   | KIF14  |
| HMMR   | KIF18B |
| HMMR   | KIF20A |
| HMMR   | KIF23  |
| HMMR   | KIF4A  |
| HMMR   | KNSTRN |
| HMMR   | NCAPD2 |

|        |        |
|--------|--------|
| HMMR   | PSRC1  |
| HMMR   | TACC3  |
| HMMR   | TOP2A  |
| HMMR   | TROAP  |
| KIF14  | KIF18B |
| KIF14  | KIF20A |
| KIF14  | KIF23  |
| KIF14  | KIF4A  |
| KIF14  | NCAPD2 |
| KIF14  | TACC3  |
| KIF14  | TOP2A  |
| KIF14  | TROAP  |
| KIF18B | KIF20A |
| KIF18B | KIF23  |
| KIF18B | KIF4A  |
| KIF18B | KNSTRN |
| KIF18B | TACC3  |
| KIF18B | TOP2A  |
| KIF18B | TROAP  |
| KIF20A | KIF23  |
| KIF20A | KIF4A  |
| KIF20A | KNSTRN |
| KIF20A | NCAPD2 |
| KIF20A | PSRC1  |
| KIF20A | TACC3  |
| KIF20A | TOP2A  |
| KIF20A | TROAP  |
| KIF23  | KIF4A  |
| KIF23  | KNSTRN |
| KIF23  | NCAPD2 |
| KIF23  | PSRC1  |
| KIF23  | TACC3  |
| KIF23  | TOP2A  |
| KIF23  | TROAP  |
| KIF23  | PIF1   |
| KIF4A  | KNSTRN |
| KIF4A  | NCAPD2 |
| KIF4A  | PSRC1  |
| KIF4A  | TACC3  |
| KIF4A  | TOP2A  |
| KIF4A  | TROAP  |
| KNSTRN | NCAPD2 |
| KNSTRN | PSRC1  |
| KNSTRN | TACC3  |
| KNSTRN | TOP2A  |
| KNSTRN | TROAP  |
| NCAPD2 | TACC3  |
| NCAPD2 | TOP2A  |
| NCAPD2 | TROAP  |
| PSRC1  | TROAP  |

|       |       |
|-------|-------|
| TACC3 | TOP2A |
| TACC3 | TROAP |
| TOP2A | TROAP |
| TOP2A | PIN1  |

## Degree

|        |    |
|--------|----|
| PLK1   | 41 |
| CCNB1  | 41 |
| CDC20  | 40 |
| BUB1B  | 38 |
| AURKA  | 38 |
| AURKB  | 38 |
| BIRC5  | 37 |
| NEK2   | 37 |
| CENPA  | 37 |
| UBE2C  | 37 |
| CDCA8  | 36 |
| CENPF  | 36 |
| KIF23  | 36 |
| FOXM1  | 35 |
| FAM64A | 35 |
| CDKN3  | 35 |
| ASPM   | 35 |
| KIF4A  | 35 |
| CDCA2  | 35 |
| CDCA3  | 35 |
| DLGAP5 | 35 |
| TOP2A  | 35 |
| HMMR   | 35 |
| CENPE  | 35 |
| TROAP  | 35 |
| KIF20A | 35 |
| GTSE1  | 34 |
| NCAPD2 | 33 |
| KNSTRN | 33 |
| TACC3  | 32 |
| KIF14  | 32 |
| FAM83D | 32 |
| PTTG1  | 32 |
| KIF18B | 30 |
| CCNF   | 29 |
| PSRC1  | 24 |
| UBB    | 11 |
| RCC2   | 10 |
| ANAPC7 | 10 |
| PIN1   | 6  |
| PIF1   | 4  |
| FOXO3  | 4  |
| FBXO43 | 3  |
